# Supplementary material
Source: bioRxiv or medRxiv preprint supplement (https://medrxiv.org/highwire/filestream/94661/field_highwire_adjunct_files/0/2020.08.25.20181545-1.pdf)
Supplement: Supplementary file [file 2020.08.25.20181545-1.pdf]

## **Supplementary Material:**

### **"I walk around like my hands are covered in mud": food safety and hand hygiene behaviours of Canadians during the COVID-19 pandemic**

Robyn Haas<sup>a,b</sup>, Fatih Sekercioglu<sup>b</sup>, Richard Meldrum<sup>b</sup>, Ian Young<sup>b\*</sup>

<sup>a</sup> Department of Population Medicine, University of Guelph, 50 Stone Road East, Guelph, Ontario, Canada N1G 2W1

<sup>b</sup> School of Occupational and Public Health, Ryerson University, 350 Victoria Street, Toronto, Ontario, Canada M5B 2K3

\* Corresponding author. Telephone: 416-979-5000 ext. 557614. Email: [iyoung@ryerson.ca](mailto:iyoung@ryerson.ca).

**This supplementary material presents:** the question guide used to conduct focus groups.

## **Focus Group Guide:**

### **Food Safety Behaviours of Canadians during the COVID-19 Pandemic**

The purpose of this focus group is to determine the food purchasing, handling, and hygiene behaviours of Canadians during the COVID-19 pandemic. The questions are open-ended, and there are no right or wrong answers. We will ask how and why you engaged in different food handling and hand hygiene behaviours. Insights and results from this study will help public health and food safety authorities to develop more effective education and communication strategies in future times of crisis or emergency. Does anyone have any questions before we begin?

#### **Warm-up / Introduction:**

1. What is your favourite type of meal to make at home?
2. How did your meal preparation and eating habits change during the COVID-19 pandemic?
3. What is your biggest food safety concern in Canada?
  - a. How did this concern change, if at all, during the COVID-19 pandemic?

#### **Part 1: Food Purchasing and Handling Behaviours**

4. To what extent did you “stockpile” food from the grocery store during the COVID-19 pandemic?
  - a. What types of foods did you stockpile or purchase more of than usual?
  - b. What about meat, poultry, or other perishable products (e.g. dairy, eggs)?

5. During the COVID-19 pandemic, how did you handle and store food upon return from the grocery store?
  - a. If meat, poultry, or other perishables were stockpiled, how did you accommodate this food? Was there sufficient space in your refrigerator and freezer?
6. How do you determine that refrigerated and frozen foods in your home are still safe to eat?
  - a. How many days on average did you keep fresh or ready-to-eat meat and poultry in your refrigerator prior to cooking? How about leftovers?
  - b. Do you own or use refrigerator or freezer thermometers? Do you think they are useful or necessary?
7. During the COVID-19 pandemic, how did you ensure that fruits and vegetables you purchased were safe to eat?
  - a. Did you wash or rinse your fruits and vegetables with water?
  - b. How about with soap? If so, where did you hear about this recommendation?

## **Part 2: Hand Hygiene and Sanitation Practices**

8. How did your handwashing practices change during the COVID-19 pandemic?
  - a. How about specifically after returning from the grocery store?
  - b. How about specifically before and after preparing food?
9. How often did you use hand sanitizer during the COVID-19 pandemic? In what circumstances did you use hand sanitizer instead of handwashing?
  - a. How about specifically after returning from the grocery store?
  - b. How about specifically before and after preparing food?
10. Did you ever prepare or consider preparing your own hand sanitizer using home-made recipes?
  - a. If so, please explain where you obtained the recipe and your preparation process.
11. How did your household sanitation practices change during the COVID-19 pandemic?
  - a. How about specifically when shopping in the grocery store? E.g. when handling shopping carts or selecting food for purchase.
  - b. How about specifically after returning from the grocery store? E.g. washing and sanitation of reusable grocery bags.
  - c. How about specifically before and after preparing food? E.g. washing and sanitation of kitchen counter tops and surfaces.

## **Part 3: Information Sources**

12. What was your primary source of information about safe food handling during the COVID-19 pandemic?

a. How did you verify the reliability of this or other sources of information?

13. What is your preferred way to receive future information about food safety during a pandemic such as COVID-19 or in another emergency situation?

**Closing:**

14. Is there anything else you would like to tell us about your food handling or hand hygiene practices during the COVID-19 pandemic?

15. In your opinion, what is the most important point or issue that we discussed today?
